# Supplementary material
Source: publisher figshare collection journal article supplement (https://plos.figshare.com/articles/dataset/_/137515)
Supplement: Supplementary file 1 [file 1 › Table_S1.pdf]

**Table S1 A: Commonly up-regulated genes in Mela1 and SLM8**

| FAST DB ID | Gene Symbol | Gene Name                                                                              | Mela1-MS vs Mela1-MA | SLM8-MS vs SLM-MA |
|------------|-------------|----------------------------------------------------------------------------------------|----------------------|-------------------|
| 9985       | TGFB1       | transforming growth factor, beta-induced, 68kDa                                        | up                   | up                |
| 1351       | ADAMTS1     | ADAM metalloproteinase with thrombospondin type 1 motif, 1                             | up                   | up                |
| 17860      | CNIH3       | cornichon homolog 3 (Drosophila)                                                       | up                   | up                |
| 11209      | LSAMP       | limbic system-associated membrane protein                                              | up                   | up                |
| 9033       | ACSS2       | acyl-CoA synthetase short-chain family member 2                                        | up                   | up                |
| 2307       | TYRP1       | tyrosinase-related protein 1                                                           | up                   | up                |
| 7203       | DTX4        | deltex 4 homolog (Drosophila)                                                          | up                   | up                |
| 16665      | TNFAIP3     | tumor necrosis factor, alpha-induced protein 3                                         | up                   | up                |
| 6931       | VCAN        | versican                                                                               | up                   | up                |
| 15792      | FASN        | fatty acid synthase                                                                    | up                   | up                |
| 2559       | SLC6A6      | solute carrier family 6 (neurotransmitter transporter, taurine), member 6              | up                   | up                |
| 2563       | SCUBE2      | signal peptide, CUB domain, EGF-like 2                                                 | up                   | up                |
| 8848       | UNC13A      | unc-13 homolog A (C. elegans)                                                          | up                   | up                |
| 11068      | CTTNBP2     | cortactin binding protein 2                                                            | up                   | up                |
| 8533       | SQLE        | squalene epoxidase                                                                     | up                   | up                |
| 12627      | RUNX2       | runx-related transcription factor 2                                                    | up                   | up                |
| 16134      | RAB17       | RAB17, member RAS oncogene family                                                      | up                   | up                |
| 13313      | RNF43       | ring finger protein 43                                                                 | up                   | up                |
| 11004      | PCSK6       | proprotein convertase subtilisin/kexin type 6                                          | up                   | up                |
| 8212       | DEPDC6      | DEP domain containing 6                                                                | up                   | up                |
| 9607       | SLC7A11     | solute carrier family 7, (cationic amino acid transporter, y+ system) member 11        | up                   | up                |
| 10744      | LAMB1       | laminin, beta 1                                                                        | up                   | up                |
| 12104      | HOXB13      | homeobox B13                                                                           | up                   | up                |
| 13058      | ---         | ---                                                                                    | up                   | up                |
| 8757       | MGAT4A      | mannosyl (alpha-1,3-)-glycoprotein beta-1,4-N-acetylglucosaminyltransferase, isozyme A | up                   | up                |
| 12422      | PLTP        | phospholipid transfer protein                                                          | up                   | up                |
| 8365       | GDF11       | growth differentiation factor 11                                                       | up                   | up                |
| 3366       | CHN2        | chimerin (chimaerin) 2                                                                 | up                   | up                |
| 1289       | ODC1        | ornithine decarboxylase 1                                                              | up                   | up                |
| 4669       | CHRNA6      | cholinergic receptor, nicotinic, alpha 6                                               | up                   | up                |
| 16655      | LPHN2       | latrophilin 2                                                                          | up                   | up                |
| 16542      | C6orf192    | chromosome 6 open reading frame 192                                                    | up                   | up                |
| 18059      | ARHGEF9     | Cdc42 guanine nucleotide exchange factor (GEF) 9                                       | up                   | up                |
| 12110      | TTLL6       | tubulin tyrosine ligase-like family, member 6                                          | up                   | up                |
| 7933       | FADS2       | fatty acid desaturase 2                                                                | up                   | up                |
| 12434      | MIA         | melanoma inhibitory activity                                                           | up                   | up                |
| 12722      | ATP10B      | ATPase, class V, type 10B                                                              | up                   | up                |
| 13882      | NCAM1       | neural cell adhesion molecule 1                                                        | up                   | up                |
| 11178      | SLC6A15     | solute carrier family 6, member 15                                                     | up                   | up                |
| 6056       | TRAF3       | TNF receptor-associated factor 3                                                       | up                   | up                |
| 14626      | SORL1       | sortilin-related receptor, L(DLR class) A repeats-containing                           | up                   | up                |
| 6759       | ACP5        | acid phosphatase 5, tartrate resistant                                                 | up                   | up                |
| 14226      | P2RX7       | purinergic receptor P2X, ligand-gated ion channel, 7                                   | up                   | up                |
| 12009      | DLL3        | delta-like 3 (Drosophila)                                                              | up                   | up                |
| 17651      | IVNS1ABP    | influenza virus NS1A binding protein                                                   | up                   | up                |
| 8276       | HAS2        | hyaluronan synthase 2                                                                  | up                   | up                |
| 7073       | ACSS1       | acyl-CoA synthetase short-chain family member 1                                        | up                   | up                |
| 883        | TNFRSF19    | tumor necrosis factor receptor superfamily, member 19                                  | up                   | up                |
| 3317       | CREB5       | cAMP responsive element binding protein 5                                              | up                   | up                |
| 16692      | SORCS1      | sortilin-related VPS10 domain containing receptor 1                                    | up                   | up                |
| 11556      | PLXNC1      | plexin C1                                                                              | up                   | up                |
| 14068      | SIDT2       | SID1 transmembrane family, member 2                                                    | up                   | up                |
| 9218       | IL16        | interleukin 16 (lymphocyte chemoattractant factor)                                     | up                   | up                |
| 7398       | TIMP1       | TIMP metalloproteinase inhibitor 1                                                     | up                   | up                |
| 5669       | JAG1        | jagged 1 (Alagille syndrome)                                                           | up                   | up                |
| 5043       | SNAI2       | snail homolog 2 (Drosophila)                                                           | up                   | up                |
| 4887       | LCP1        | lymphocyte cytosolic protein 1 (L-plastin)                                             | up                   | up                |
| 12030      | SDC4        | syndecan 4                                                                             | up                   | up                |

**Table S1 B: Commonly down-regulated genes in Mela1 and SLM8**

| FAST DB ID | Gene Symbol | Gene Name                                                                       | Mela1-MS vs Mela1-MA | SLM8-MS vs SLM8-MA |
|------------|-------------|---------------------------------------------------------------------------------|----------------------|--------------------|
| 2429       | ABCB5       | ATP-binding cassette, sub-family B (MDR/TAP), member 5                          | down                 | down               |
| 15344      | IFIT3       | interferon-induced protein with tetratricopeptide repeats 3                     | down                 | down               |
| 10288      | KIF20A      | kinesin family member 20A                                                       | down                 | down               |
| 11298      | MGAT5       | mannosyl (alpha-1,6-)-glycoprotein beta-1,6-N-acetyl-glucosaminyltransferase    | down                 | down               |
| 6323       | IMPA1       | inositol(myo)-1(or 4)-monophosphatase 1                                         | down                 | down               |
| 9066       | GDF15       | growth differentiation factor 15                                                | down                 | down               |
| 211        | PYGL        | phosphorylase, glycogen; liver (Hers disease, glycogen storage disease type VI) | down                 | down               |

**Table S1 C: Oppositely regulated genes in Mela1 and SLM8**

| FAST DB ID | Gene Symbol | Gene Name                                                              | Mela1-MS vs Mela1-MA | SLM8-MS vs SLM8-MA |
|------------|-------------|------------------------------------------------------------------------|----------------------|--------------------|
| 8795       | RORB        | RAR-related orphan receptor B                                          | up                   | down               |
| 8995       | FLNB        | filamin B, beta (actin binding protein 278)                            | down                 | up                 |
| 14953      | SLC2A1      | solute carrier family 2 (facilitated glucose transporter), member 1    | down                 | up                 |
| 1459       | ENO2        | enolase 2 (gamma, neuronal)                                            | down                 | up                 |
| 15717      | FER1L3      | fer-1-like 3, myoferlin (C. elegans)                                   | down                 | up                 |
| 5912       | PLOD1       | procollagen-lysine 1, 2-oxoglutarate 5-dioxygenase 1                   | down                 | up                 |
| 17105      | SLC16A1     | solute carrier family 16, member 1 (monocarboxylic acid transporter 1) | down                 | up                 |
| 9005       | ECE1        | endothelin converting enzyme 1                                         | down                 | up                 |
