# Supplementary material
Source: publisher figshare collection journal article supplement (https://plos.figshare.com/articles/dataset/_/137515)
Supplement: Supplementary file 1 [file 1 › Table_S2.pdf]

**Table S2: Developmental processes regulated genes**

| Up Mela1<br>MS/MA fold | Developmental<br>processes | Down Mela1<br>MS/MA fold | Developmental<br>processes | Up SLM8<br>MS/MA fold | Developmental<br>processes | Down SLM8<br>MS/MA fold | Developmental<br>processes |
|------------------------|----------------------------|--------------------------|----------------------------|-----------------------|----------------------------|-------------------------|----------------------------|
| 15.28                  | TGFB1                      | 4.34                     | ID3                        | 7.14                  | MGP                        | 2.45                    | KIF20A                     |
| 6.83                   | DNER                       | 3.83                     | MCAM                       | 4.82                  | TGFB1                      | 2.34                    | LRP2                       |
| 5.40                   | PLXNC1                     | 2.59                     | GDF15                      | 3.85                  | ADAMTS1                    | 2.17                    | PLK1                       |
| 5.05                   | JAG1                       | 2.50                     | SEMA3A                     | 3.82                  | CNIH3                      | 2.06                    | BUB1B                      |
| 4.94                   | EPHA3                      | 2.45                     | LMO4                       | 3.64                  | L1CAM                      | 1.89                    | PHF19                      |
| 4.75                   | DLL3                       | 2.34                     | TES                        | 3.35                  | CUBN                       | 1.88                    | DLC1                       |
| 4.58                   | NCAM1                      | 2.15                     | TTF2                       | 3.35                  | LSAMP                      | 1.76                    | MAMDC2                     |
| 4.37                   | RORB                       | 2.03                     | SKIL                       | 3.29                  | DUSP1                      | 1.67                    | HEY2                       |
| 4.25                   | SCML1                      | 2.03                     | KIF2C                      | 3.15                  | PDK1                       | 1.54                    | PPP1CA                     |
| 3.73                   | PCSK6                      | 1.88                     | EPAS1                      | 3.07                  | DTX4                       | 1.51                    | ABL1                       |
| 3.42                   | BMP7                       | 1.87                     | KIF20A                     | 2.99                  | PLK2                       | 1.40                    | SBNO2                      |
| 3.30                   | TNFRSF19                   | 1.85                     | EYA3                       | 2.53                  | SEMA3D                     | 1.36                    | GDF15                      |
| 3.24                   | TIMP1                      | 1.77                     | CAMK4                      | 2.52                  | TNS1                       | 1.34                    | RB1                        |
| 3.21                   | ERBB4                      | 1.65                     | HS2ST1                     | 2.45                  | SCUBE2                     | 1.31                    | ABLIM1                     |
| 2.97                   | LSAMP                      | 1.62                     | NOTCH2                     | 2.44                  | KLF4                       | 1.29                    | RORB                       |
| 2.82                   | CNIH3                      | 1.57                     | ZFR                        | 2.25                  | RUNX2                      | 1.28                    | CHM                        |
| 2.75                   | MET                        | 1.57                     | MFN2                       | 2.21                  | EDIL3                      | No. genes >1.5          | 10                         |
| 2.66                   | EYA4                       | 1.55                     | TRAK2                      | 2.19                  | PCSK6                      | 1.5> no. >1.2           | 6                          |
| 2.57                   | THBS2                      | 1.51                     | PARD6B                     | 2.08                  | RORA                       | Total                   | 16                         |
| 2.52                   | SMAD9                      | 1.51                     | MSH2                       | 2.05                  | KDR                        |                         |                            |
| 2.38                   | PYGO1                      | 1.48                     | RARB                       | 1.99                  | EPHA2                      |                         |                            |
| 2.30                   | RUNX2                      | 1.34                     | ABLIM3                     | 1.95                  | GDF11                      |                         |                            |
| 2.27                   | DTX4                       | 1.30                     | LRIG2                      | 1.89                  | PBX4                       |                         |                            |
| 2.25                   | PTPRZ1                     | 1.29                     | WDR35                      | 1.86                  | TNC                        |                         |                            |
| 2.23                   | SDC4                       |                          | IFRD1                      | 1.77                  | PAN2                       |                         |                            |
| 2.19                   | ROBO2                      | No. genes >1.5           | 21                         | 1.77                  | FABP3                      |                         |                            |
| 2.16                   | GDF11                      | 1.5> no. >1.2            | 4                          | 1.76                  | NRCAM                      |                         |                            |
| 2.13                   | SCUBE2                     | Total                    | 25                         | 1.76                  | LDLR                       |                         |                            |
| 2.12                   | ADAMTS1                    |                          |                            | 1.75                  | DLG4                       |                         |                            |
| 2.09                   | KIT                        |                          |                            | 1.70                  | VLDLR                      |                         |                            |
| 2.07                   | SEMA5A                     |                          |                            | 1.65                  | NCAM1                      |                         |                            |
| 2.02                   | CRB1                       |                          |                            | 1.64                  | LRP1                       |                         |                            |
| 1.94                   | THBS1                      |                          |                            | 1.64                  | HOXB9                      |                         |                            |
| 1.78                   | ACP5                       |                          |                            | 1.63                  | FGFR1                      |                         |                            |
| 1.72                   | PELO                       |                          |                            | 1.60                  | ACP5                       |                         |                            |
| 1.62                   | EPHA4                      |                          |                            | 1.59                  | DLL3                       |                         |                            |
| 1.57                   | PRKACB                     |                          |                            | 1.56                  | MORF4L2                    |                         |                            |
| 1.55                   | IL16                       |                          |                            | 1.54                  | TNFRSF19                   |                         |                            |
| 1.48                   | GAB1                       |                          |                            | 1.53                  | LDLRAD3                    |                         |                            |
| 1.48                   | ADAM23                     |                          |                            | 1.48                  | LRP6                       |                         |                            |
| 1.43                   | MERTK                      |                          |                            | 1.44                  | PAX9                       |                         |                            |
| 1.39                   | POR                        |                          |                            | 1.44                  | LAMA1                      |                         |                            |
| No. genes >1.5         | 39                         |                          |                            | 1.42                  | RSF1                       |                         |                            |
| 1.5> no. >1.2          | 4                          |                          |                            | 1.42                  | CDON                       |                         |                            |
| Total                  | 43                         |                          |                            | 1.41                  | DZIP1                      |                         |                            |
|                        |                            |                          |                            | 1.39                  | DIP2C                      |                         |                            |
|                        |                            |                          |                            | 1.39                  | NEO1                       |                         |                            |
|                        |                            |                          |                            | 1.37                  | PLXNC1                     |                         |                            |
|                        |                            |                          |                            | 1.36                  | NFKB2                      |                         |                            |
|                        |                            |                          |                            | 1.36                  | IL16                       |                         |                            |
|                        |                            |                          |                            | 1.35                  | SMAD3                      |                         |                            |
|                        |                            |                          |                            | 1.35                  | TIMP1                      |                         |                            |
|                        |                            |                          |                            | 1.35                  | JAG1                       |                         |                            |
|                        |                            |                          |                            | 1.34                  | GRN                        |                         |                            |
|                        |                            |                          |                            | 1.33                  | MLL                        |                         |                            |
|                        |                            |                          |                            | 1.28                  | DCT                        |                         |                            |
|                        |                            |                          |                            | 1.27                  | CRIP2                      |                         |                            |
|                        |                            |                          |                            | 1.20                  | SDC4                       |                         |                            |
|                        |                            |                          |                            |                       | 39                         |                         |                            |
|                        |                            |                          |                            | No. genes >1.5        | 19                         |                         |                            |
|                        |                            |                          |                            | 1.5> no. >1.2         |                            |                         |                            |
|                        |                            |                          |                            | Total                 | 58                         |                         |                            |
