# Supplementary material
Source: publisher figshare collection journal article supplement (https://plos.figshare.com/articles/dataset/_/137515)
Supplement: Supplementary file 1 [file 1 › Table_S3.pdf]

**Table S3: Ectoderm, Neurogenesis, Mesoderm, and skeletal regulated genes**

| Up Mela1<br>MS/MA<br>fold | Ectoderm | Neuro-<br>genesis |
|---------------------------|----------|-------------------|
| 6.83                      | DNER     | DNER              |
| 5.05                      | JAG1     | JAG1              |
| 4.94                      | EPHA3    | EPHA3             |
| 4.75                      | DLL3     | DLL3              |
| 4.58                      | NCAM1    | NCAM1             |
| 2.97                      | LSAMP    | LSAMP             |
| 2.38                      | PYGO1    | PYGO1             |
| 2.27                      | DTX4     | DTX4              |
| 2.19                      | ROBO2    | ROBO2             |
| 2.12                      | ADAMTS1  | ADAMTS1           |
| 2.07                      | SEMA5A   | SEMA5A            |
| 2.02                      | CRB1     | CRB1              |
| 1.62                      | EPHA4    | EPHA4             |
| 1.55                      | IL16     | IL16              |
| No. genes >1.5            | 14       | 14                |
| 1.5> no. >1.2             | 0        | 0                 |
| Total                     | 14       | 14                |

| Up SLM8<br>MS/MA<br>fold | Ectoderm | Neuro-<br>genesis |
|--------------------------|----------|-------------------|
| 3.85                     | ADAMTS1  | ADAMTS1           |
| 3.64                     | L1CAM    | L1CAM             |
| 3.35                     | CUBN     | CUBN              |
| 3.35                     | LSAMP    | LSAMP             |
| 3.07                     | DTX4     | DTX4              |
| 2.53                     | SEMA3D   | SEMA3D            |
| 1.99                     | EPHA2    | EPHA2             |
| 1.86                     | TNC      | TNC               |
| 1.77                     | PAN2     | PAN2              |
| 1.77                     | FABP3    |                   |
| 1.76                     | NRCAM    | NRCAM             |
| 1.75                     | DLG4     | DLG4              |
| 1.65                     | NCAM1    | NCAM1             |
| 1.64                     | HOXB9    | HOXB9             |
| 1.63                     | FGFR1    | FGFR1             |
| 1.59                     | DLL3     | DLL3              |
| 1.39                     | DIP2C    | DIP2C             |
| 1.39                     | NEO1     | NEO1              |
| 1.36                     | IL16     | IL16              |
| 1.35                     | JAG1     | JAG1              |
| 1.28                     | DCT      |                   |
| No. genes >1.5           | 16       | 16                |
| 1.5> no. >1.2            | 5        | 4                 |
| Total                    | 21       | 20                |

| Up Mela1<br>MS/MA<br>fold | Mesoderm | Skeletal |
|---------------------------|----------|----------|
| 15.28                     | TGFBI    | TGFBI    |
| 4.94                      | EPHA3    |          |
| 3.73                      | PCSK6    |          |
| 3.42                      | BMP7     | BMP7     |
| 2.30                      | RUNX2    | RUNX2    |
| 2.23                      | SDC4     | SDC4     |
| 2.16                      | GDF11    |          |
| 2.13                      | SCUBE2   | SCUBE2   |
| 2.12                      | ADAMTS1  | ADAMTS1  |
| 1.78                      | ACP5     | ACP5     |
| 1.62                      | EPHA4    |          |
| 1.48                      | GAB1     |          |
| No. genes >1.5            | 11       | 7        |
| 1.5> no. >1.2             | 1        |          |
| Total                     | 12       | 7        |

| Up SLM8<br>MS/MA<br>fold | Mesoderm | Skeletal |
|--------------------------|----------|----------|
| 7.14                     | MGP      | MGP      |
| 4.82                     | TGFBI    | TGFBI    |
| 3.85                     | ADAMTS1  | ADAMTS   |
| 3.29                     | DUSP1    |          |
| 2.53                     | SEMA3D   |          |
| 2.52                     | TNS1     |          |
| 2.45                     | SCUBE2   | SCUBE2   |
| 2.44                     | KLF4     |          |
| 2.25                     | RUNX2    | RUNX2    |
| 2.21                     | EDIL3    |          |
| 2.19                     | PCSK6    |          |
| 2.05                     | KDR      |          |
| 1.99                     | EPHA2    |          |
| 1.95                     | GDF11    |          |
| 1.89                     | PBX4     |          |
| 1.86                     | TNC      |          |
| 1.60                     | ACP5     | ACP5     |
| 1.44                     | PAX9     | PAX9     |
| 1.42                     | CDON     |          |
| 1.27                     | CRIP2    |          |
| 1.20                     | SDC4     | SDC4     |
| No. genes >1.5           | 17       | 6        |
| 1.5> no. >1.2            | 4        | 2        |
| Total                    | 21       | 8        |

| Down Mela1<br>MS/MA<br>fold | Ectoderm | Neuro-<br>genesis |
|-----------------------------|----------|-------------------|
| 2.50                        | SEMA3A   | SEMA3A            |
| 2.45                        | LMO4     | LMO4              |
| 2.15                        | TTF2     | TTF2              |
| 1.88                        | EPAS1    | EPAS1             |
| 1.77                        | CAMK4    | CAMK4             |
| 1.62                        | NOTCH2   | NOTCH2            |
| 1.55                        | TRAK2    | TRAK2             |
| 1.48                        | ABLIM3   | ABLIM3            |
| 1.30                        | WDR35    | WDR35             |
| 1.29                        | IFRD1    | IFRD1             |
| No. genes<br>>1.5           | 7        | 7                 |
| 1.5> no. >1.2               | 3        | 3                 |
| Total                       | 10       | 10                |

| Dowm SLM8<br>MS/MA<br>fold | Ectoderm | Neuro-<br>genesis |
|----------------------------|----------|-------------------|
| 1.67                       | HEY2     | HEY2              |
| 1.31                       | ABLIM1   | ABLIM1            |
| No. genes<br>>1.5          | 1        | 1                 |
| 1.5> no. >1.2              | 1        | 1                 |
| Total                      | 2        | 2                 |

| Down Mela1<br>MS/MA<br>fold | Mesoderm | Skeletal |
|-----------------------------|----------|----------|
| 2.59                        | GDF15    | GDF15    |
| 2.50                        | SEMA3A   |          |
| 2.45                        | LMO4     |          |
| 2.15                        | TTF2     |          |
| 2.03                        | SKIL     |          |
| No. genes<br>>1.5           | 5        | 1        |
| 1.5> no. >1.2               | 0        | 0        |
| Total                       | 5        | 1        |

| Down SLM8<br>MS/MA<br>fold | Mesoderm | Skeletal |
|----------------------------|----------|----------|
| 1.36                       | GDF15    | GDF15    |
| No. genes<br>>1.5          | 0        | 0        |
| 1.5> no. >1.2              | 1        | 1        |
| Total                      | 1        | 1        |
