# Supplementary material
Source: publisher figshare collection journal article supplement (https://plos.figshare.com/articles/dataset/_/137515)
Supplement: Supplementary file 1 [file 1 › Table_S4.pdf]

**Table S4: Adhesion/Communication regulated genes**

| Up Mela1 MS/MA fold | Cell adhesion | Cell communication | Cell adhesion signaling | ECM signaling |
|---------------------|---------------|--------------------|-------------------------|---------------|
| 41.89               |               | CCL18              |                         |               |
| 15.28               | TGFB1         | TGFB1              |                         | TGFB1         |
| 6.83                |               | DNER               |                         |               |
| 4.75                |               | DLL3               |                         |               |
| 4.58                | NCAM1         | NCAM1              | NCAM1                   |               |
| 4.31                |               | CHRNA6             |                         |               |
| 3.35                | LAMA4         | LAMA4              | LAMA4                   | LAMA4         |
| 3.30                |               | TNFRSF19           |                         |               |
| 2.97                | LSAMP         |                    |                         |               |
| 2.75                |               | MET                |                         |               |
| 2.68                |               | MAG11              |                         |               |
| 2.52                |               | SMAD9              |                         |               |
| 2.45                | GRIP1         | GRIP1              |                         |               |
| 2.40                |               | TMT1               |                         |               |
| 2.38                |               | IL6R               |                         |               |
| 2.37                |               | ADAMTS3            | ADAMTS3                 |               |
| 2.30                | PCOLCE        |                    |                         |               |
| 2.25                | PTPRZ1        | PTPRZ1             |                         |               |
| 2.25                | HMCN1         |                    |                         |               |
| 2.23                | SDC4          |                    |                         |               |
| 2.19                | ROBO2         |                    |                         |               |
| 2.14                | ITGA7         |                    |                         |               |
| 2.13                |               | SCUBE2             | SCUBE2                  |               |
| 2.12                |               | ADAMTS1            | ADAMTS1                 | ADAMTS1       |
| 2.07                |               | SEMA5A             |                         |               |
| 2.02                |               | CRB1               |                         |               |
| 1.85                |               | LAMC1              | LAMC1                   | LAMC1         |
| 1.71                | CD96          | CD96               |                         |               |
| 1.57                |               | PRKACB             |                         |               |
| 1.51                | ITGA9         |                    |                         |               |
| 1.50                |               | LAMB1              | LAMB1                   | LAMB1         |
| 1.48                |               | ADAM23             | ADAM23                  |               |
| 1.47                |               | CORO1C             |                         |               |
| 1.39                | POR           |                    |                         |               |
| No. genes >1.5      | 13            | 25                 | 7                       | 5             |
| 1.5> no. >1.2       | 1             | 2                  | 1                       | 0             |
| Total               | 14            | 27                 | 8                       | 5             |

| Down Mela1 MS/MA fold | Cell adhesion | Cell communication | Cell adhesion signaling | ECM signaling |
|-----------------------|---------------|--------------------|-------------------------|---------------|
| 3.83                  | MCAM          |                    |                         |               |
| 2.91                  |               | MME                |                         |               |
| 2.59                  |               | GDF15              |                         |               |
| 2.50                  |               | SEMA3A             |                         |               |
| 2.35                  |               | CAP2               |                         |               |
| 2.15                  |               | TTF2               |                         |               |
| 1.99                  | FN1           | FN1                | FN1                     | FN1           |
| 1.84                  | ITGA3         |                    |                         |               |
| 1.74                  |               | PER3               |                         |               |
| 1.62                  |               | NOTCH2             | NOTCH2                  |               |
| 1.51                  |               | RARB               |                         |               |
| 1.47                  |               | IFNGR1             |                         |               |
| 1.42                  |               | ECE1               |                         |               |
| 1.41                  | NET1          |                    |                         |               |
| 1.35                  | PIK3CD        | PIK3CD             | PIK3CD                  |               |
| 1.29                  | BYSL          |                    |                         |               |
| 1.25                  |               | CTNNB1             | CTNNB1                  |               |
| No. genes >1.5        | 3             | 8                  | 2                       | 1             |
| 1.5> no. >1.2         | 3             | 4                  | 2                       | 0             |
| Total                 | 6             | 12                 | 4                       | 1             |

| Up SLM8 MS/MA fold | Cell adhesion | Cell communication | Cell adhesion signaling | ECM signaling |
|--------------------|---------------|--------------------|-------------------------|---------------|
| 7.14               |               | MGP                |                         |               |
| 5.45               | LOXL3         |                    |                         |               |
| 4.82               | TGFB1         | TGFB1              |                         | TGFB1         |
| 4.69               |               | IGFBP5             |                         | IGFBP5        |
| 3.85               |               | ADAMTS1            | ADAMTS1                 | ADAMTS1       |
| 3.64               | L1CAM         | L1CAM              | L1CAM                   |               |
| 3.35               |               | CUBN               | CUBN                    |               |
| 3.35               | LSAMP         |                    |                         |               |
| 3.22               | LOX           |                    |                         |               |
| 2.56               | CDH1          | CDH1               | CDH1                    |               |
| 2.53               |               | SEMA3D             |                         |               |
| 2.52               | TNS1          |                    |                         |               |
| 2.45               |               | SCUBE2             | SCUBE2                  |               |
| 2.40               | GPC6          |                    |                         |               |
| 2.34               | GLT25D2       |                    |                         |               |
| 2.28               |               | CORO2B             |                         |               |
| 2.21               |               | EDIL3              |                         |               |
| 2.09               |               | LAMB1              | LAMB1                   | LAMB1         |
| 2.02               |               | PRELP              | PRELP                   |               |
| 1.88               |               | CHRNA6             |                         |               |
| 1.86               |               | TNC                | TNC                     |               |
| 1.85               | ITGA5         |                    |                         |               |
| 1.83               |               | SLC1A1             | TSPAN5                  |               |
| 1.80               |               | CD82               | CD82                    |               |
| 1.80               | PTPRO         | PTPRO              | PTPRO                   |               |
| 1.77               |               | FABP3              |                         |               |
| 1.76               | NRCAM         | NRCAM              | NRCAM                   |               |
| 1.70               | LOXL2         |                    |                         |               |
| 1.68               |               | CD70               |                         |               |
| 1.65               | NCAM1         | NCAM1              | NCAM1                   |               |
| 1.64               | HSPG2         | HSPG2              | HSPG2                   | HSPG2         |
| 1.60               | CDH19         | CDH19              | CDH19                   |               |
| 1.59               |               | LUM                | LUM                     |               |
| 1.59               |               | DLL3               |                         |               |
| 1.59               |               | ECE1               |                         |               |
| 1.54               |               | TNFRSF19           |                         |               |
| 1.53               |               | SCG2               |                         |               |
| 1.50               |               | PTPRJ              |                         |               |
| 1.50               | PTPRM         | PTPRM              | PTPRM                   |               |
| 1.44               | LAMA1         | LAMA1              |                         | LAMA1         |
| 1.42               | MAGED2        |                    |                         |               |
| 1.42               | CDON          |                    |                         |               |
| 1.41               |               | OGT                |                         |               |
| 1.39               | NEO1          | NEO1               |                         |               |
| 1.35               |               | SMAD3              |                         |               |
| 1.34               |               | GRN                |                         |               |
| 1.30               | ATRNL1        |                    |                         |               |
| 1.26               | TSPAN5        | TSPAN5             |                         |               |
| 1.20               | SDC4          |                    |                         |               |
| No. genes >1.5     | 17            | 31                 | 15                      | 6             |
| 1.5> no. >1.2      | 7             | 6                  | 1                       | 1             |
| Total              | 24            | 37                 | 16                      | 7             |

| Down SLM8 MS/MA fold | Cell adhesion | Cell communication | Cell adhesion signaling | ECM signaling |
|----------------------|---------------|--------------------|-------------------------|---------------|
| 9.89                 |               | TF                 |                         |               |
| 2.40                 | LOXL4         |                    |                         |               |
| 1.36                 |               | GDF15              |                         |               |
| 1.28                 | CHM           | CHM                |                         |               |
| 1.24                 | CBLL1         |                    |                         |               |
| No. genes >1.5       | 1             | 1                  | 0                       | 0             |
| 1.5> no. >1.2        | 2             | 2                  | 0                       | 0             |
| Total                | 3             | 3                  | 0                       | 0             |
