# Supplementary material
Source: publisher figshare collection journal article supplement (https://plos.figshare.com/articles/dataset/_/137515)
Supplement: Supplementary file 1 [file 1 › Table_S5.pdf]

**Table S5: Structure/motility regulated genes**

| Up Mela1 MS/MA fold | Cell structure and motility | Motility |
|---------------------|-----------------------------|----------|
| 5.05                | JAG1                        | JAG1     |
| 2.75                | MET                         | MET      |
| 2.45                | GRIP1                       |          |
| 2.31                | LCP1                        |          |
| 2.09                | KIT                         | KIT      |
| 2.02                | CRB1                        | CRB1     |
| 1.83                | GSN                         |          |
| 1.47                | CORO1C                      | CORO1C   |
| 1.43                | MERTK                       | MERTK    |
| 1.39                | POR                         | POR      |
| 1.33                | KLHL7                       |          |
| 1.25                | KLHL20                      |          |
| No. genes >1.5      | 7                           | 4        |
| 1.5> no. >1.2       | 5                           | 3        |
| Total               | 12                          | 7        |

| Down Mela1 MS/MA fold | Cell structure and motility | Motility |
|-----------------------|-----------------------------|----------|
| 2.35                  | CAP2                        |          |
| 2.34                  | TES                         | TES      |
| 2.15                  | TTF2                        |          |
| 1.99                  | FN1                         |          |
| 1.87                  | KIF20A                      |          |
| 1.72                  | WDR63                       |          |
| 1.63                  | NET1                        |          |
| 1.62                  | NOTCH2                      | NOTCH2   |
| 1.59                  | LMNB1                       |          |
| 1.56                  | DOCK5                       | DOCK5    |
| 1.48                  | ABLIM3                      | ABLIM3   |
| 1.32                  | MYO10                       |          |
| 1.32                  | PLS1                        |          |
| 1.28                  | FLNB                        | FLNB     |
| 1.20                  | ARPC1B                      |          |
| No. genes >1.5        | 10                          | 3        |
| 1.5> no. >1.2         | 5                           | 2        |
| Total                 | 15                          | 5        |

| Up SLM8 MS/MA fold | Cell structure and motility | Motility |
|--------------------|-----------------------------|----------|
| 3.35               | CUBN                        | CUBN     |
| 3.15               | PDK1                        |          |
| 2.95               | FLNB                        | FLNB     |
| 2.92               | GEM                         |          |
| 2.52               | TNS1                        | TNS1     |
| 2.28               | CORO2B                      | CORO2B   |
| 1.87               | ITPR1                       | ITPR1    |
| 1.62               | KTN1                        |          |
| 1.55               | KIAA1598                    | KIAA1598 |
| 1.55               | PC                          |          |
| 1.48               | KIF21A                      |          |
| 1.39               | NEO1                        | NEO1     |
| 1.35               | JAG1                        | JAG1     |
| 1.21               | LCP1                        |          |
| No. genes >1.5     | 10                          | 6        |
| 1.5> no. >1.2      | 4                           | 2        |
| Total              | 14                          | 8        |

| Down SLM8 MS/MA fold | Cell structure and motility | Motility |
|----------------------|-----------------------------|----------|
| 2.57                 | MBP                         |          |
| 2.45                 | KIF20A                      |          |
| 1.94                 | GTSE1                       |          |
| 1.66                 | SVIL                        |          |
| 1.57                 | TJP1                        |          |
| 1.54                 | PPP1CA                      |          |
| 1.51                 | ABL1                        | ABL1     |
| 1.42                 | DIAPH3                      | DIAPH3   |
| 1.31                 | ABLIM1                      | ABLIM1   |
| 1.31                 | CKAP5                       |          |
| 1.29                 | PHLDB1                      |          |
| 1.28                 | CHM                         |          |
| 1.28                 | FLNA                        | FLNA     |
| 1.24                 | CBLL1                       | CBLL1    |
| 1.23                 | ACTN4                       |          |
| 1.23                 | LRRC58                      |          |
| 1.23                 | ACTR6                       |          |
| No. genes >1.5       | 7                           | 1        |
| 1.5> no. >1.2        | 10                          | 4        |
| Total                | 17                          | 5        |
