# Supplementary material
Source: publisher figshare collection journal article supplement (https://plos.figshare.com/articles/dataset/_/137515)
Supplement: Supplementary file 1 [file 1 › Table_S6.pdf]

**Table S6: Immunity and defense**

| Up Mela1 MS/MA fold | Immunity and defense | Other immune/defense |
|---------------------|----------------------|----------------------|
| 41.89               | CCL18                |                      |
| 5.05                | JAG1                 |                      |
| 3.30                | TNFRSF19             |                      |
| 2.82                | CNIH3                |                      |
| 2.75                | MET                  |                      |
| 2.57                | THBS2                |                      |
| 2.45                | GRIP1                | GRIP1                |
| 2.38                | IL6R                 |                      |
| 2.23                | SDC4                 |                      |
| 2.09                | KIT                  |                      |
| 2.07                | SEMA5A               | SEMA5A               |
| 2.02                | CRB1                 |                      |
| 1.98                | SLC11A2              |                      |
| 1.94                | THBS1                |                      |
| 1.71                | CD96                 |                      |
| 1.71                | IFI16                |                      |
| 1.55                | IL16                 |                      |
| 1.55                | DUSP10               |                      |
| 1.48                | GAB1                 |                      |
| 1.43                | MERTK                |                      |
| 1.37                | PLSCR1               |                      |
| 1.31                | TRAF3                |                      |
| 1.30                | TAP2                 |                      |
| No. genes >1.5      | 18                   | 2                    |
| 1.5>no.>1.2         | 5                    | 0                    |
| Total               | 23                   | 2                    |

| Down Mela1 MS/MA fold | Immunity and defense | Other immune/defense |
|-----------------------|----------------------|----------------------|
| 2.07                  | LRRC40               | LRRC40               |
| 1.73                  | PAFAH2               | PAFAH2               |
| 1.62                  | NOTCH2               |                      |
| 1.53                  | IFIT3                |                      |
| 1.49                  | CREBL1               |                      |
| 1.47                  | IFNGR1               |                      |
| 1.39                  | XRCC5                |                      |
| 1.29                  | PLA2G4A              | PLA2G4A              |
| No. genes >1.5        | 4                    | 2                    |
| 1.5>no.>1.2           | 4                    | 1                    |
| Total                 | 8                    | 3                    |

| Up SLM8 MS/MA fold | Immunity and defense | Other immune and defense |
|--------------------|----------------------|--------------------------|
| 7.33               | CST7                 |                          |
| 4.88               | PTGS2                |                          |
| 3.82               | CNIH3                |                          |
| 3.51               | NPTX2                |                          |
| 3.35               | CUBN                 |                          |
| 2.52               | TNS1                 |                          |
| 2.12               | FCER1G               | FCER1G                   |
| 2.07               | IL27RA               |                          |
| 1.87               | ITPR1                |                          |
| 1.80               | CD82                 |                          |
| 1.77               | ATM                  |                          |
| 1.71               | CD55                 |                          |
| 1.68               | TBXAS1               |                          |
| 1.68               | CD70                 | CD70                     |
| 1.64               | TRAF3                |                          |
| 1.62               | ABCC4                |                          |
| 1.55               | PC                   |                          |
| 1.54               | TNFRSF19             | TNFRSF19                 |
| 1.50               | NFKBIA               |                          |
| 1.37               | RELB                 | RELB                     |
| 1.36               | NFKB2                | NFKB2                    |
| 1.36               | IL16                 |                          |
| 1.35               | JAG1                 |                          |
| 1.34               | IRAK3                |                          |
| 1.34               | GRN                  |                          |
| 1.30               | ATRNL1               |                          |
| 1.20               | SDC4                 |                          |
| No. genes >1,5     | 19                   | 3                        |
| 1,5>no.>1,2        | 8                    | 2                        |
| Total              | 27                   | 5                        |

| Down SLM8 MS/MA fold | Immunity and defense | Other immune/defense |
|----------------------|----------------------|----------------------|
| 9.89                 | TF                   |                      |
| 2.61                 | IFIT3                |                      |
| 2.57                 | MBP                  |                      |
| 2.49                 | CIITA                |                      |
| 1.94                 | GTSE1                |                      |
| 1.42                 | LRRK2                |                      |
| 1.39                 | ASNA1                |                      |
| 1.24                 | TRAP1                |                      |
| 1.23                 | LRRC58               |                      |
| No. genes >1.5       | 5                    | 0                    |
| 1.5>no.>12           | 4                    | 0                    |
| Total                | 9                    | 0                    |
