# Supplementary material
Source: publisher figshare collection journal article supplement (https://plos.figshare.com/articles/dataset/_/137515)
Supplement: Supplementary file 1 [file 1 › Table_S7.pdf]

### Table S7: Molecular functions regulated genes

| Up Mela1 MS/MA fold   | ECM    | Up SLM8 MS/MA fold   | ECM    | Up Mela1 MS/MA fold   | Cell adhesion molecule | Up SLM8 MS/MA fold   | Cell adhesion molecule |
|-----------------------|--------|----------------------|--------|-----------------------|------------------------|----------------------|------------------------|
| 3.35                  | LAMA4  | 7.14                 | MGP    | 15.28                 | TGFBI                  | 4.82                 | TGFBI                  |
| 2.83                  | MMP16  | 4.52                 | LG13   | 4.58                  | NCAM1                  | 3.64                 | L1CAM                  |
| 2.57                  | THBS2  | 2.45                 | SCUBE2 | 4.05                  | TSPAN12                | 2.56                 | CDH1                   |
| 2.30                  | PCOLCE | 2.40                 | GPC6   | 2.97                  | LSAMP                  | 2.40                 | GPC6                   |
| 2.25                  | HMCN1  | 2.35                 | MMP8   | 2.45                  | GRIP1                  | 1.86                 | TNC                    |
| 2.23                  | SDC4   | 2.09                 | LAMB1  | 2.25                  | HMCN1                  | 1.85                 | ITGA5                  |
| 2.13                  | SCUBE2 | 2.02                 | PRELP  | 2.23                  | SDC4                   | 1.76                 | NRCAM                  |
| 1.94                  | THBS1  | 1.86                 | TNC    | 2.14                  | ITGA7                  | 1.65                 | NCAM1                  |
| 1.85                  | LAMC1  | 1.64                 | HSPG2  | 1.51                  | ITGA9                  | 1.60                 | CDH19                  |
| 1.60                  | GPR124 | 1.60                 | EDIL3  | No. genes >1.5        | 9                      | 1.42                 | MAGED2                 |
| 1.50                  | LAMB1  | 1.59                 | LUM    | 1.5> no. >1.2         | 0                      | 1.42                 | CDON                   |
| No. genes >1.5        | 11     | 1.55                 | PC     | Total                 | 9                      | 1.39                 | NEO1                   |
| 1.5> no. >1.2         | 0      | 1.44                 | LAMA1  |                       |                        | 1.26                 | TSPAN5                 |
| Total                 | 11     | 1.20                 | SDC4   |                       |                        | 1.20                 | SDC4                   |
|                       |        | No. genes >1.5       | 12     |                       |                        | No. genes >1.5       | 9                      |
|                       |        | 1.5> no. >1.2        | 2      |                       |                        | 1.5> no. >1.2        | 5                      |
|                       |        | Total                | 14     |                       |                        | Total                | 14                     |
|                       |        |                      |        |                       |                        |                      |                        |
| Down Mela1 MS/MA fold | ECM    | Down SLM8 MS/MA fold | ECM    | Down Mela1 MS/MA fold | Cell adhesion molecule | Down SLM8 MS/MA fold | Cell adhesion molecule |
| 2.91                  | MME    | 2.57                 | MBP    | 3.83                  | MCAM                   | 2.40                 | LSAMP                  |
| 1.99                  | FN1    | No. genes >1.5       | 1      | 1.99                  | FN1                    | 1.28                 | CHM                    |
| 1.34                  | LRIG2  | 1.5> no. >1.2        | 0      | 1.84                  | ITGA3                  | No. genes >1.5       | 1                      |
| No. genes >1.5        | 2      | Total                | 1      | 1.35                  | PIK3CD                 | Total                | 1                      |
| 1.5> no. >1.2         | 1      |                      |        | 1.25                  | CTNNB1                 | 1.5> no. >1.2        | 2                      |
| Total                 | 3      |                      |        | No. genes >1.5        | 3                      |                      |                        |
|                       |        |                      |        | 1.5> no. >1.2         | 2                      |                      |                        |
|                       |        |                      |        | Total                 | 5                      |                      |                        |

| Up Mela1<br>MS/MA fold | Cytoskeletal<br>protein | Actin binding | Non-motor<br>actin binding |
|------------------------|-------------------------|---------------|----------------------------|
| 2.94                   | KIF13A                  |               |                            |
| 2.31                   | LCP1                    | LCP1          | LCP1                       |
| 2.23                   | SDC4                    |               |                            |
| 1.99                   | TTL6                    |               |                            |
| 1.83                   | GSN                     | GSN           | GSN                        |
| 1.47                   | CORO1C                  | CORO1C        | CORO1C                     |
| 1.33                   | KLHL7                   | KLHL7         | KLHL7                      |
| 1.25                   | KLHL20                  | KLHL20        | KLHL20                     |
| No. genes >1.5         | 5                       | 2             | 2                          |
| 1.5> no. >1.2          | 3                       | 3             | 3                          |
| Total                  | 8                       | 5             | 5                          |

| Down Mela1 MS/MA fold | Cytoskeletal protein | Actin binding | Non-motor actin binding |
|-----------------------|----------------------|---------------|-------------------------|
| 2.45                  | LMO4                 | LMO4          |                         |
| 2.35                  | CAP2                 | CAP2          |                         |
| 2.34                  | TES                  | TES           |                         |
| 2.03                  | KIF2C                |               |                         |
| 1.87                  | KIF20A               |               |                         |
| 1.72                  | WDR63                |               |                         |
| 1.66                  | MYO1B                | MYO1B         |                         |
| 1.59                  | LMNB1                |               |                         |
| 1.48                  | ABLIM3               | ABLIM3        |                         |
| 1.37                  | KIFC1                |               |                         |
| 1.32                  | MYO10                | MYO10         |                         |
| 1.32                  | PLS1                 | PLS1          | PLS1                    |
| 1.28                  | FLNB                 | FLNB          | FLNB                    |
| 1.25                  | CTNNB1               |               |                         |
| 1.20                  | ARPC1B               | ARPC1B        |                         |
| No. genes >1.5        | 8                    | 4             | 0                       |
| 1.5> no. >1.2         | 7                    | 5             | 2                       |
| Total                 | 15                   | 9             | 2                       |

| Up SLM8 MS/MA fold | Cytoskeletal protein | Actin binding | Non-motor actin binding |
|--------------------|----------------------|---------------|-------------------------|
| 2.95               | FLNB                 | FLNB          | FLNB                    |
| 2.52               | TNS1                 | TNS1          | TNS1                    |
| 2.28               | CORO2B               | CORO2B        | CORO2B                  |
| 1.86               | TNC                  | TNC           |                         |
| 1.76               | TTLL6                |               |                         |
| 1.62               | KTN1                 |               |                         |
| 1.55               | KIAA1598             | KIAA1598      | KIAA1598                |
| 1.55               | PC                   |               |                         |
| 1.48               | KIF21A               |               |                         |
| 1.30               | FHOD1                | FHOD1         | FHOD1                   |
| 1.27               | CRIP2                | CRIP2         |                         |
| 1.25               | TTLL5                |               |                         |
| 1.21               | LCP1                 | LCP1          | LCP1                    |
| 1.20               | SDC4                 |               |                         |
| No. genes >1.5     | 8                    | 5             | 4                       |
| 1.5> no. >1.2      | 6                    | 3             | 2                       |
| Total              | 14                   | 8             | 6                       |

| Down SLM8<br>MSMA fold | Cytoskeletal<br>protein | Actin<br>binding | Non-motor<br>actin binding |
|------------------------|-------------------------|------------------|----------------------------|
| 2.45                   | KIF20A                  |                  |                            |
| 2.16                   | PRC1                    |                  |                            |
| 1.88                   | DLC1                    |                  |                            |
| 1.66                   | SVIL                    | SVIL             | SVIL                       |
| 1.42                   | DIAPH3                  | DIAPH3           | DIAPH3                     |
| 1.31                   | ABLIM1                  | ABLIM1           |                            |
| 1.31                   | CKAP5                   |                  |                            |
| 1.29                   | PHLDB1                  |                  |                            |
| 1.28                   | FLNA                    | FLNA             | FLNA                       |
| 1.26                   | MYO1C                   | MYO1C            |                            |
| 1.23                   | ACTN4                   | ACTN4            | ACTN4                      |
| 1.23                   | LRRC58                  | LRRC58           |                            |
| 1.23                   | ACTR6                   | ACTR6            |                            |
| No. genes >1.5         | 4                       | 1                | 1                          |
| 1.5> no. >1.2          | 9                       | 7                | 3                          |
| Total                  | 13                      | 8                | 4                          |
