# Supplementary material
Source: publisher figshare collection journal article supplement (https://plos.figshare.com/articles/dataset/_/137515)
Supplement: Supplementary file 1 [file 1 › Table_S8.pdf]

**Table S8: Molecular functions regulated genes**

| Up Mela1 MS/MA fold   | Receptor | Other receptor | Up SLM8 MS/MA fold   | Receptor | Other receptor | Up Mela1 MS/MA fold   | Membrane-bound signaling | Up SLM8 MS/MA fold   | Membrane-bound signaling |
|-----------------------|----------|----------------|----------------------|----------|----------------|-----------------------|--------------------------|----------------------|--------------------------|
| 6.83                  | DNER     |                | 5.45                 | LOXL3    | LOXL3          | 6.83                  | DNER                     | 3.82                 | CNIH3                    |
| 5.40                  | PLXNC1   |                | 4.52                 | LGI3     |                | 5.05                  | JAG1                     | 3.35                 | CUBN                     |
| 5.05                  | JAG1     |                | 3.35                 | CUBN     | CUBN           | 4.75                  | DLL3                     | 2.53                 | SEMA3D                   |
| 4.94                  | EPHA3    |                | 3.22                 | LOX      | LOX            | 4.05                  | TSPAN12                  | 1.80                 | CD82                     |
| 4.75                  | DLL3     |                | 3.14                 | OLFML3   |                | 2.82                  | CNIH3                    | 1.59                 | DLL3                     |
| 4.37                  | RORB     |                | 2.41                 | UNC13A   | UNC13A         | 2.07                  | SEMA5A                   | 1.35                 | JAG1                     |
| 4.31                  | CHRNA6   |                | 2.22                 | TRPM3    |                | 2.02                  | CRB1                     | 1.26                 | TSPAN5                   |
| 3.30                  | TNFRSF19 |                | 2.12                 | FCER1G   |                | No. genes >1.5        | 7                        | No. genes >1.5       | 5                        |
| 3.21                  | ERBB4    |                | 2.08                 | RORA     |                | 1.5> no. >1.2         | 0                        | 1.5> no. >1.2        | 2                        |
| 2.88                  | LPHN2    |                | 2.07                 | IL27RA   |                | Total                 | 7                        | Total                | 7                        |
| 2.78                  | SORCS1   | SORCS1         | 2.05                 | KDR      |                |                       |                          |                      |                          |
| 2.75                  | MET      |                | 2.02                 | PRELP    |                | Down Mela1 MS/MA fold | Membrane-bound signaling | Down SLM8 MS/MA fold | Membrane-bound signaling |
| 2.74                  | UNC13A   | UNC13A         | 1.99                 | EPHA2    |                | 2.50                  | SEMA3A                   |                      |                          |
| 2.71                  | LPHN3    |                | 1.88                 | CHRNA6   |                | 1.62                  | NOTCH2                   | No. genes >1.5       | 0                        |
| 2.55                  | P2RX7    |                | 1.87                 | ITPR1    |                | No. genes >1.5        | 2                        | 1.5> no. >1.2        | 0                        |
| 2.38                  | IL6R     |                | 1.85                 | LPHN2    |                | 1.5> no. >1.2         | 0                        | Total                | 0                        |
| 2.26                  | SORL1    | SORL1          | 1.80                 | PTPRO    | PTPRO          | Total                 | 2                        |                      |                          |
| 2.25                  | PTPRZ1   | PTPRZ1         | 1.76                 | LDLR     | LDLR           |                       |                          |                      |                          |
| 2.21                  | OGFRL1   | OGFRL1         | 1.70                 | VLDLR    | VLDLR          |                       |                          |                      |                          |
| 2.19                  | ROBO2    |                | 1.70                 | LOXL2    | LOXL2          |                       |                          |                      |                          |
| 2.12                  | P2RY1    |                | 1.64                 | LRP1     | LRP1           |                       |                          |                      |                          |
| 2.09                  | KIT      |                | 1.63                 | FGFR1    |                |                       |                          |                      |                          |
| 2.02                  | CRB1     |                | 1.61                 | SORL1    | SORL1          |                       |                          |                      |                          |
| 1.76                  | ERBB3    |                | 1.59                 | LUM      |                |                       |                          |                      |                          |
| 1.71                  | GRINA    |                | 1.59                 | P2RX7    |                |                       |                          |                      |                          |
| 1.62                  | EPHA4    |                | 1.59                 | DLL3     |                |                       |                          |                      |                          |
| 1.60                  | GPR124   |                | 1.54                 | TNFRSF1  |                |                       |                          |                      |                          |
| 1.58                  | PRSS12   | PRSS12         | 1.53                 | LDLRAD3  | LDLRAD3        |                       |                          |                      |                          |
| 1.43                  | MERTK    |                | 1.52                 | SEZ6L2   | SEZ6L2         |                       |                          |                      |                          |
| No. genes >1.5        | 28       | 6              | 1.50                 | PTPRJ    | PTPRJ          |                       |                          |                      |                          |
| 1.5>nb>1.2            | 1        | 0              | 1.50                 | PTPRM    | PTPRM          |                       |                          |                      |                          |
| Total                 | 29       | 6              | 1.48                 | LRP6     | LRP6           |                       |                          |                      |                          |
|                       |          |                | 1.45                 | LENG8    |                |                       |                          |                      |                          |
|                       |          |                | 1.40                 | SORCS1   | SORCS1         |                       |                          |                      |                          |
|                       |          |                | 1.39                 | NEO1     | NEO1           |                       |                          |                      |                          |
|                       |          |                | 1.37                 | PLXNC1   |                |                       |                          |                      |                          |
|                       |          |                | 1.35                 | JAG1     |                |                       |                          |                      |                          |
|                       |          |                | 1.34                 | IRAK3    |                |                       |                          |                      |                          |
|                       |          |                | No. genes >1.5       | 31       | 14             |                       |                          |                      |                          |
|                       |          |                | 1.5>no.>1.2          | 7        | 3              |                       |                          |                      |                          |
|                       |          |                | Total                | 38       | 17             |                       |                          |                      |                          |
|                       |          |                |                      |          |                |                       |                          |                      |                          |
|                       |          |                | Down SLM8 MS/MA fold | Receptor | Other receptor |                       |                          |                      |                          |
|                       |          |                | 9.89                 | TF       |                |                       |                          |                      |                          |
|                       |          |                | 2.78                 | TRPM1    |                |                       |                          |                      |                          |
|                       |          |                | 2.40                 | LOXL4    | LOXL4          |                       |                          |                      |                          |
|                       |          |                | 2.34                 | GPRC5B   |                |                       |                          |                      |                          |
|                       |          |                | 2.34                 | LRP2     | LRP2           |                       |                          |                      |                          |
|                       |          |                | 1.82                 | KREMEN1  | KREMEN1        |                       |                          |                      |                          |
|                       |          |                | 1.29                 | RORB     |                |                       |                          |                      |                          |
|                       |          |                | nb genes >1,5        | 6        | 3              |                       |                          |                      |                          |
|                       |          |                | 1,5>nb>1,2           | 1        | 0              |                       |                          |                      |                          |
|                       |          |                | total                | 7        | 3              |                       |                          |                      |                          |
|                       |          |                |                      |          |                |                       |                          |                      |                          |
| Down Mela1 MS/MA fold | Receptor | Other receptor |                      |          |                |                       |                          |                      |                          |
| 2.12                  | SORT1    | SORT1          |                      |          |                |                       |                          |                      |                          |
| 2.00                  | TFRC     | TFRC           |                      |          |                |                       |                          |                      |                          |
| 1.68                  | SLC20A1  |                |                      |          |                |                       |                          |                      |                          |
| 1.62                  | NOTCH2   |                |                      |          |                |                       |                          |                      |                          |
| 1.51                  | RARB     |                |                      |          |                |                       |                          |                      |                          |
| 1.47                  | IFNGR1   |                |                      |          |                |                       |                          |                      |                          |
| 1.34                  | LRIG2    |                |                      |          |                |                       |                          |                      |                          |
| 1.27                  | LRPPRC   |                |                      |          |                |                       |                          |                      |                          |
| No. genes >1.5        | 5        | 2              |                      |          |                |                       |                          |                      |                          |
| 1.5>no.>1.2           | 3        | 0              |                      |          |                |                       |                          |                      |                          |
| Total                 | 8        | 2              |                      |          |                |                       |                          |                      |                          |
