# Supplementary material
Source: publisher figshare collection journal article supplement (https://plos.figshare.com/articles/dataset/_/137515)
Supplement: Supplementary file 1 [file 1 › Table_S9.pdf]

**Table S9: Signaling pathways regulated genes**

| Up Mela1 MS/MA fold | Notch |
|---------------------|-------|
| 6.83                | DNER  |
| 5.05                | JAG1  |
| 4.75                | DLL3  |
| 1.48                | PSEN2 |
| No. genes >1.5      | 3     |
| 1.5> no. >1.2       | 1     |
| Total               | 4     |

| Down Mela1 MS/MA fold | Notch  |
|-----------------------|--------|
| 1.62                  | NOTCH2 |
| No. genes >1.5        | 1      |
| 1.5> no. >1.2         | 0      |
| Total                 | 1      |

| Up SLM8 MS/MA fold | Notch |
|--------------------|-------|
| 3.35               | CUBN  |
| 1.59               | DLL3  |
| 1.35               | JAG1  |
| No. genes >1.5     | 2     |
| 1.5> no. >1.2      | 1     |
| Total              | 3     |

| Down SLM8 MS/MA fold | Notch |
|----------------------|-------|
| 1.67                 | HEY2  |
| No. genes >1.5       | 1     |
| 1.5> no. >1.2        | 0     |
| Total                | 1     |

| Up Mela1 MS/MA fold | Axon guidance |
|---------------------|---------------|
| 3.85                | DPYSL3        |
| No. genes >1.5      | 1             |
| 1.5> no. >1.2       | 0             |
| Total               | 1             |

| Down Mela1 MS/MA fold | Axon guidance |
|-----------------------|---------------|
| 2.50                  | SEMA3A        |
| 1.41                  | NET1          |
| No. genes >1.5        | 1             |
| 1.5> no. >1.2         | 1             |
| Total                 | 2             |

| Up SLM8 MS/MA fold | Axon guidance |
|--------------------|---------------|
| 1.79               | PLCG1         |
| 1.39               | NEO1          |
| No. genes >1.5     | 1             |
| 1.5> no. >1.2      | 1             |
| Total              | 2             |

| Down SLM8 MS/MA fold | Axon guidance |
|----------------------|---------------|
| 1.31                 | ABLIM1        |
| No. genes >1.5       | 0             |
| 1.5> no. >1.2        | 1             |
| Total                | 1             |

| Up Mela1 MS/MA fold | Endothelin |
|---------------------|------------|
| 2.22                | ADCY1      |
| 2.12                | PRKCA      |
| 1.57                | PRKACB     |
| 1.46                | MAPK1      |
| No. genes >1.5      | 3          |
| 1.5> no. >1.2       | 1          |
| Total               | 4          |

| Down Mela1 MS/MA fold | Endothelin |
|-----------------------|------------|
| 1.51                  | PIK3R3     |
| 1.42                  | ECE1       |
| 1.35                  | PIK3CD     |
| 1.29                  | PLA2G4A    |
| No. genes >1.5        | 1          |
| 1.5> no. >1.2         | 3          |
| Total                 | 4          |

| Up SLM8 MS/MA fold | Endothelin |
|--------------------|------------|
| 4.88               | PTGS2      |
| 1.93               | NPR1       |
| 1.87               | ITPR1      |
| 1.59               | ECE1       |
| 1.27               | NPR2       |
| No. genes >1.5     | 4          |
| 1.5> no. >1.2      | 1          |
| Total              | 5          |

| Down SLM8 MS/MA fold | Endothelin |
|----------------------|------------|
| No. genes >1.5       | 0          |
| 1.5> no. >1.2        | 0          |
| Total                | 0          |

| Up Mela1 MS/MA fold | Angiogenesis |
|---------------------|--------------|
| 6.83                | DNER         |
| 5.05                | JAG1         |
| 4.94                | EPHA3        |
| 4.75                | DLL3         |
| 2.12                | PRKCA        |
| 1.62                | EPHA4        |
| 1.46                | MAPK1        |
| No. genes >1.5      | 6            |
| 1.5> no. >1.2       | 1            |
| Total               | 7            |

| Down Mela1 MS/MA fold | Angiogenesis |
|-----------------------|--------------|
| 1.62                  | NOTCH2       |
| 1.51                  | PIK3R3       |
| 1.40                  | STAT1        |
| 1.35                  | PIK3CD       |
| 1.29                  | PLA2G4A      |
| 1.25                  | CTNNB1       |
| No. genes >1.5        | 2            |
| 1.5> no. >1.2         | 4            |
| Total                 | 6            |

| Up SLM8 MS/MA fold | Angiogenesis |
|--------------------|--------------|
| 3.35               | CUBN         |
| 2.05               | KDR          |
| 1.79               | PLCG1        |
| 1.63               | FGFR1        |
| 1.59               | DLL3         |
| 1.50               | PTPRJ        |
| 1.35               | JAG1         |
| No. genes >1.5     | 6            |
| 1.5> no. >1.2      | 1            |
| Total              | 7            |

| Down SLM8 MS/MA fold | Angiogenesis |
|----------------------|--------------|
| 9.89                 | TF           |
| 2.00                 | PRKD1        |
| No. genes >1.5       | 2            |
| 1.5> no. >1.2        | 0            |
| Total                | 2            |
