# Supplementary material
Source: publisher figshare collection journal article supplement (https://plos.figshare.com/articles/dataset/_/137515)
Supplement: Supplementary file 1 [file 1 › Table_S10.pdf]

**Table S10:** Nucleotide sequences of quantitative PCR primers and corresponding annealing temperature

| Primers         | Sequence (5'-3')                        | Annealing temperature |
|-----------------|-----------------------------------------|-----------------------|
| <i>OCT4</i> –F  | 5'-ACA TCA AAG CTC TGC AGA AAG AAC T-3' | 63°C                  |
| <i>OCT4</i> -R  | 5'-CTG AAT ACC TTC CCA AAT AGA ACC C-3' |                       |
| <i>NANOG</i> -F | 5'-CAG CTG TGT GTA CTC AAT GAT AGA-3'   | 63°C                  |
| <i>NANOG</i> -R | 5'-ACA CCA TTG CTA TTC TTC GGC CAG-3'   |                       |
| <i>KLF4</i> -F  | 5'- CGA ACC CAC ACA GGT GAG AA-3'       | 57°C                  |
| <i>KLF4</i> -R  | 5'- CTG AGC GGG CGA ATT TCC AT-3'       |                       |
| <i>SOX2</i> -F  | 5'-CAG TCT GCC GAG AAT CCA TG-3'        | 57°C                  |
| <i>SOX2</i> -R  | 5'-TTT TTT TTT TCA GTG TCC ATA TTT C-3' |                       |
