# Supplementary material
Source: publisher figshare collection journal article supplement (https://plos.figshare.com/articles/dataset/_/137515)
Supplement: Supplementary file 1 [file 1 › Table_S11.pdf]

**Table S11:** Nucleotide sequences of semi-quantitative PCR primers, corresponding annealing temperature and number of cycles performed

| Primers         | Sequence (5'-3')                     | Annealing temperature | Number of cycles |
|-----------------|--------------------------------------|-----------------------|------------------|
| <i>EPHA2-F</i>  | 5'-ACC CCC CTC CGC CCC ACA C-3'      | 62°C                  | 27               |
| <i>EPHA2-R</i>  | 5'-GCC CTC CAG CCT CAC CTT G-3'      |                       |                  |
| <i>EPHA3-F</i>  | 5'-ACT TCC GGG CAG ACA AAG ACC-3'    | 64°C                  | 27               |
| <i>EPHA3-R</i>  | 5'-GAC AGG TGA TGG AGC AGC CTG-3'    |                       |                  |
| <i>ERBB4-F</i>  | 5'-GGA GAT AAC CAG CAT TGA GC-3'     | 58°C                  | 35               |
| <i>ERBB4-R</i>  | 5'-TGA TTA AGA GCC ACT AAC ACG-3'    |                       |                  |
| <i>SEMA3D-F</i> | 5'-GGA ATT GTC TCT GAA GCA GCA-3'    | 58°C                  | 32               |
| <i>SEMA3D-R</i> | 5'-TGC GCA AGC TTT CCC ATA AG-3'     |                       |                  |
| <i>GDF11-F</i>  | 5'-GAT CCT GGA CCT ACA CGA CTT C-3'  | 62°C                  | 31               |
| <i>GDF11-R</i>  | 5'-GGC CTT CAG TAC CTT TGT GAA C-3'  |                       |                  |
| <i>GDF15-F</i>  | 5'-CCT CAG AGT TGC ACT CCG AAG-3'    | 64°C                  | 25               |
| <i>GDF15-R</i>  | 5'-GAT CCC AGC CGC ACT TCT GG-3'     |                       |                  |
| <i>PLXC1-F</i>  | 5'-CTA ACC ATT GCA CTG CAA ACC-3'    | 60°C                  | 27               |
| <i>PLXC1-R</i>  | 5'-GAT TCC ATC TTC AAG AAT CAC G-3'  |                       |                  |
| <i>SNAI2-F</i>  | 5'-AGA TGC ATA TTC GGA CCC AC-3'     | 58°C                  | 25               |
| <i>SNAI2-R</i>  | 5'-CCT CAT GTT TGT GCA GGA GA-3'     |                       |                  |
| <i>IL-16-F</i>  | 5'-ATG CCC GAC CTC AAC TCC TC-3'     | 58°C                  | 28               |
| <i>IL-16-R</i>  | 5'-CTC CTG ATG ACA ATC GTG AC-3'     |                       |                  |
| <i>JAG1-F</i>   | 5'-CTA TGA TGA GGG GGA TGC T-3'      | 53°C                  | 30               |
| <i>JAG1-R</i>   | 5'-CGT CCA TTC AGG CAC TGG-3'        |                       |                  |
| <i>CIITA-F</i>  | 5'-TTT CTG GGC ACC CGC CTC AC-3'     | 53°C                  | 30               |
| <i>CIITA-R</i>  | 5'-CTG GGG GAA GGT GGC TGA GA-3'     |                       |                  |
| <i>RPL13-F</i>  | 5'-GGA AGT ACC AGG CAG TGA CAG CT-3' | 61°C                  | 22               |
| <i>RPL13-R</i>  | 5'-CTT CTC GGC CTG TTT CCG TAG-3'    |                       |                  |
